# Supplementary material for: Novel Rigidochromic and Anti-Kasha Dual Emission Fluorophores Based on D-π-A Dyads as the Promising Materials for Potential Applications Ranging from Optoelectronics and Optical Sensing to Biophotonics and Medicine
Source: MDPI journal article supplement (doi:10.3390/ijms24065818), 2023-03-18
Supplement: s1 [file s1]

## ***Supporting Information***

*Article*

# **Novel rigidochromic and anti-Kasha (DE) fluorophores based on D- $\pi$ -A diads as the promising materials for potential applications ranging from optoelectronics and optical sensing to biophotonics and medicine**

Svetlana A. Lermontova<sup>1</sup>, Maxim V. Arsenyev<sup>1</sup>, Anton V. Cherkasov<sup>1</sup>, Georgy K. Fukin<sup>1</sup>, Andrey V. Afanasyev<sup>2</sup>, Andrey V. Yudintsev<sup>3</sup>, Ilya S. Grigoryev<sup>1</sup>, Elena Yu. Ladilina<sup>1</sup>, Tatyana S. Lyubova<sup>1</sup>, Natalia Yu. Shilyagina<sup>3</sup>, Irina V. Balalaeva<sup>3</sup>, Larisa G. Klapshina<sup>1</sup> and Alexandr V. Piskunov<sup>1,\*</sup>

\* Correspondence: pial@iomc.ras.ru; Tel.: +7 920 045 18 04

**Table S1.**Crystal data and structure refinement details for **AntTCNE** and **PyrTCNE**.

|                                             | <b>AntTCNE</b>                                | <b>PyrTCNE</b>                                |
|---------------------------------------------|-----------------------------------------------|-----------------------------------------------|
| <i>T</i>                                    | 298 K                                         | 100 K                                         |
| Empirical formula                           | C <sub>19</sub> H <sub>9</sub> N <sub>3</sub> | C <sub>21</sub> H <sub>9</sub> N <sub>3</sub> |
| <i>M</i>                                    | 279.29                                        | 303.31                                        |
| Crystal system                              | Monoclinic                                    | Monoclinic                                    |
| Space group                                 | <i>P2<sub>1</sub>/c</i>                       | <i>P2<sub>1</sub>/n</i>                       |
| Unit cell dimensions                        | <i>a</i> = 7.0957(4) Å                        | <i>a</i> = 7.8371(8) Å                        |
|                                             | <i>b</i> = 10.5265(6) Å                       | <i>b</i> = 7.4670(9) Å                        |
|                                             | <i>c</i> = 20.0061(12) Å                      | <i>c</i> = 24.535(3) Å                        |
|                                             | $\alpha = 90^\circ$                           | $\alpha = 90^\circ$                           |
|                                             | $\beta = 90.020(2)^\circ$                     | $\beta = 92.972(4)^\circ$                     |
|                                             | $\gamma = 90^\circ$                           | $\gamma = 90^\circ$                           |
| <i>V</i> , Å <sup>3</sup>                   | 1494.31(15)                                   | 1433.9(3)                                     |
| <i>Z</i>                                    | 4                                             | 4                                             |
| <i>d<sub>calc</sub></i> , g/cm <sup>3</sup> | 1.241                                         | 1.405                                         |
| $\mu$ , mm <sup>-1</sup>                    | 0.076                                         | 0.085                                         |
| <i>F<sub>000</sub></i>                      | 576                                           | 624                                           |
| Crystal dimensions, mm                      | 0.50 × 0.23 × 0.08                            | 0.77 × 0.25 × 0.24                            |
| $\theta$ range for data collection, °       | 2.04-25.09                                    | 2.49-27.16                                    |
| <i>hkl</i> indices                          | $-8 \leq h \leq 8$                            | $-10 \leq h \leq 10$                          |
|                                             | $-12 \leq k \leq 12$                          | $-9 \leq k \leq 9$                            |
|                                             | $-23 \leq l \leq 23$                          | $-31 \leq l \leq 31$                          |
| Reflns collected                            | 18766                                         | 15074                                         |
| Independent reflns with $I > 2\sigma(I)$    | 1582 [0.0550]                                 | 2400 (0.1478)                                 |
| [ <i>R<sub>int</sub></i> ]                  |                                               |                                               |

|                                            |                  |                 |
|--------------------------------------------|------------------|-----------------|
| Completeness to $\theta$ , %               | 97.6             | 99.5            |
| Data / restraints / parameters             | 2600 / 299 / 277 | 3208 / 0 / 219  |
| $S(F^2)$                                   | 1.053            | 1.038           |
| Final $R$ indices ( $F^2 > 2\sigma(F^2)$ ) | $R_I = 0.0663$   | $R_I = 0.0804$  |
|                                            | $wR_2 = 0.1163$  | $wR_2 = 0.2013$ |
| $R$ indices (all data)                     | $R_I = 0.1180$   | $R_I = 0.1088$  |
|                                            | $wR_2 = 0.1347$  | $wR_2 = 0.2179$ |
| Largest diff peak                          | 0.11 / -0.12     | 0.36 / -0.43    |
| and hole, e/ $\text{\AA}^3$                |                  |                 |

---

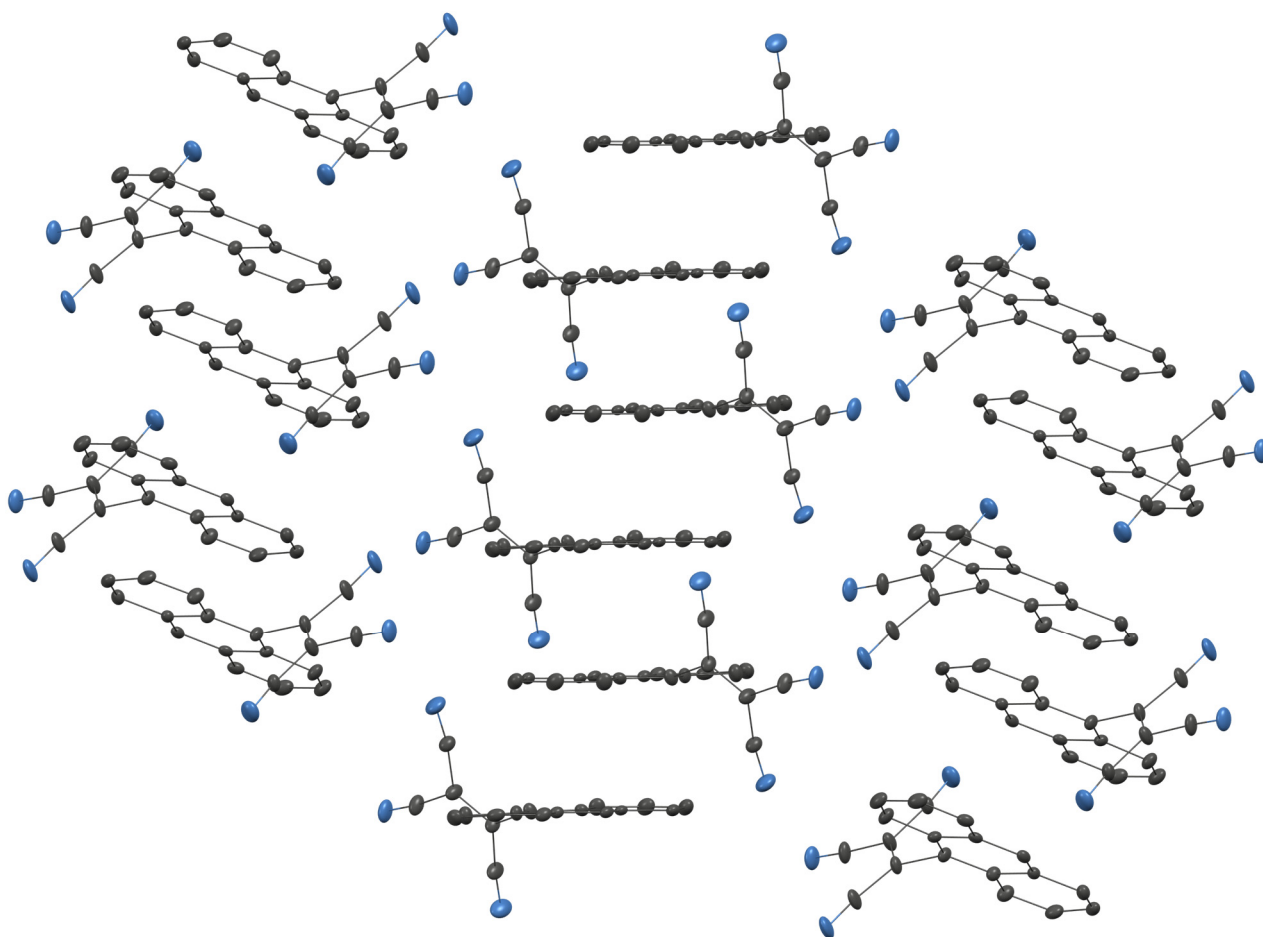

**Figure S1.** The fragment of the crystal packing of AntTCNE along the  $(-1\ 4\ -2)$  vector. Thermal ellipsoids are drawn at 10% probability level. Hydrogen atoms are omitted for clarity. Color code: carbon, black; nitrogen, blue.

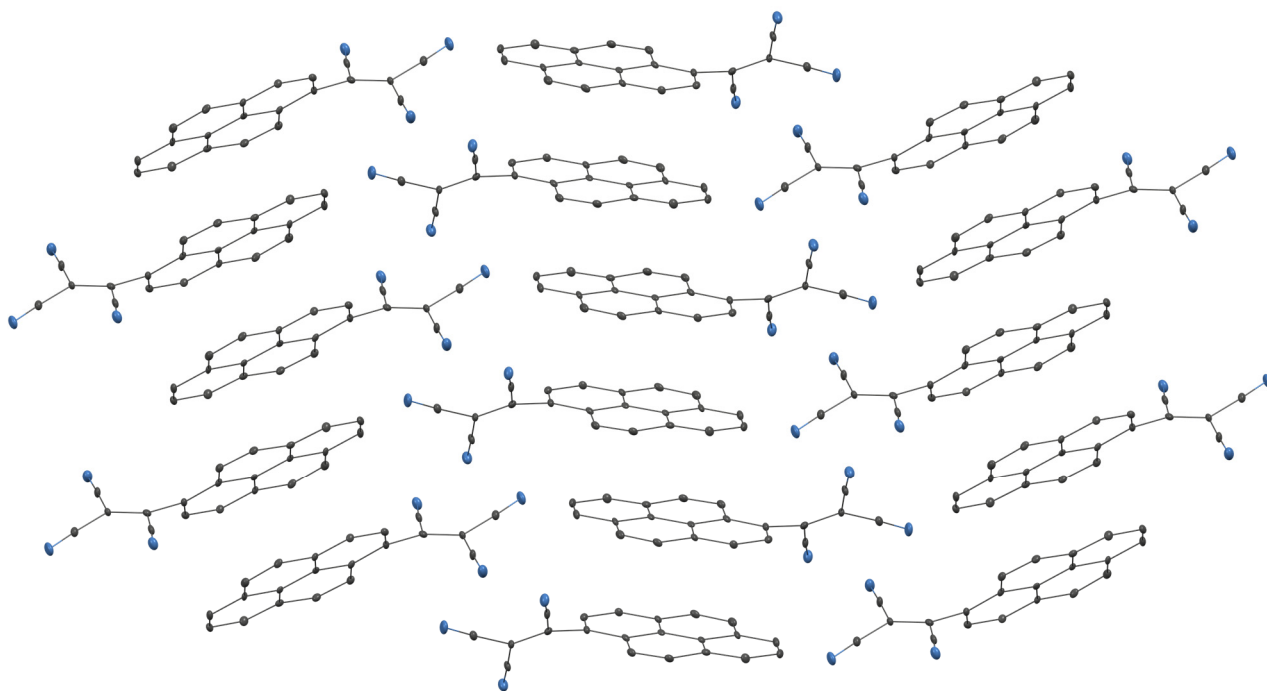

**Figure S2.** The fragment of the crystal packing of **PyrTCNE** along the  $(3\ 0\ 0)$  vector. Thermal ellipsoids are drawn at 10% probability level. Hydrogen atoms are omitted for clarity. Color code: carbon, black; nitrogen, blue.

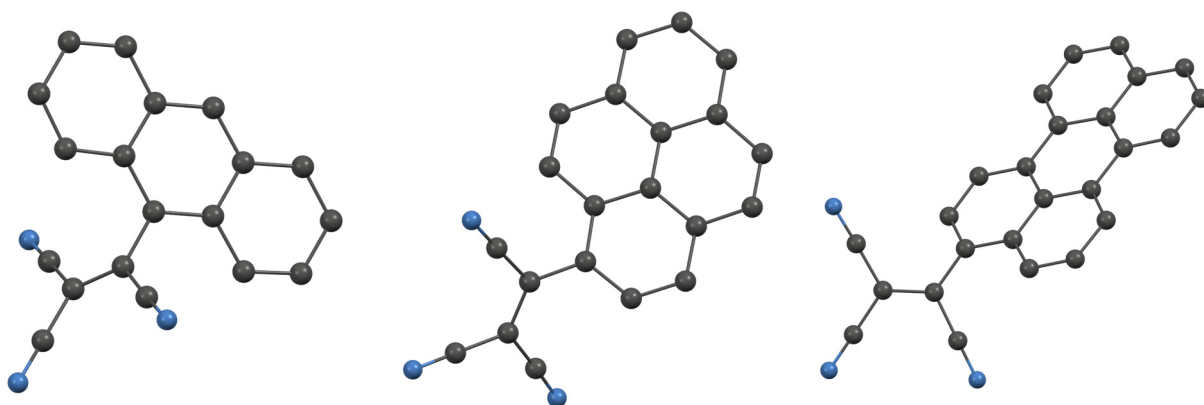

**Figure S3.** Theoretical molecular structures of **AntTCNE** (left), **PyrTCNE** (center) and **PerTCNE** (right). Hydrogen atoms are omitted for clarity. Color code: carbon, black; nitrogen, blue.

**Table S2.**Selected bond lengths in **AntTCNE**, **PyrTCNE** and **PerTCNE**.

|           | <b>AntTCNE</b>      | <b>PyrTCNE</b>      | <b>PerTCNE</b> |
|-----------|---------------------|---------------------|----------------|
| N(1)-C(1) | 1.116(5)<br>[1.161] | 1.144(5)<br>[1.161] | -<br>[1.162]   |
| N(2)-C(3) | 1.118(5)<br>[1.161] | 1.141(4)<br>[1.161] | -<br>[1.162]   |
| N(3)-C(5) | 1.117(5)<br>[1.162] | 1.142(4)<br>[1.161] | -<br>[1.161]   |
| C(2)-C(1) | 1.451(6)<br>[1.431] | 1.432(5)<br>[1.430] | -<br>[1.430]   |
| C(2)-C(3) | 1.450(6)<br>[1.431] | 1.439(4)<br>[1.431] | -<br>[1.430]   |
| C(4)-C(5) | 1.452(6)<br>[1.431] | 1.449(5)<br>[1.434] | -<br>[1.434]   |
| C(2)-C(4) | 1.335(5)<br>[1.368] | 1.364(4)<br>[1.375] | -<br>[1.377]   |
| C(4)-C(6) | 1.520(5)<br>[1.481] | 1.474(4)<br>[1.470] | -<br>[1.457]   |

The theoretical data are given in square brackets. For **AntTCNE**, the bond lengths of only one of the TCNE sites are given.

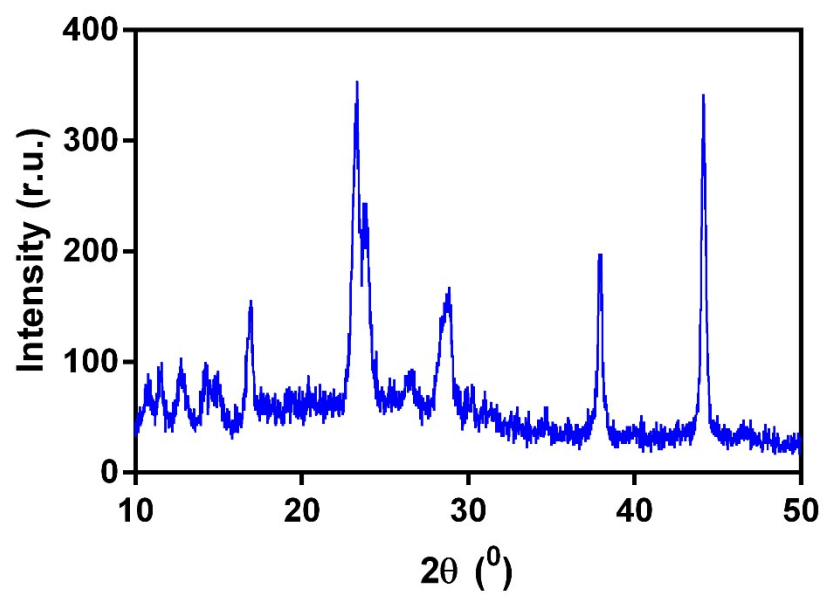

**Figure S4.** X-ray diffraction pattern of **PerTCNE** powder.

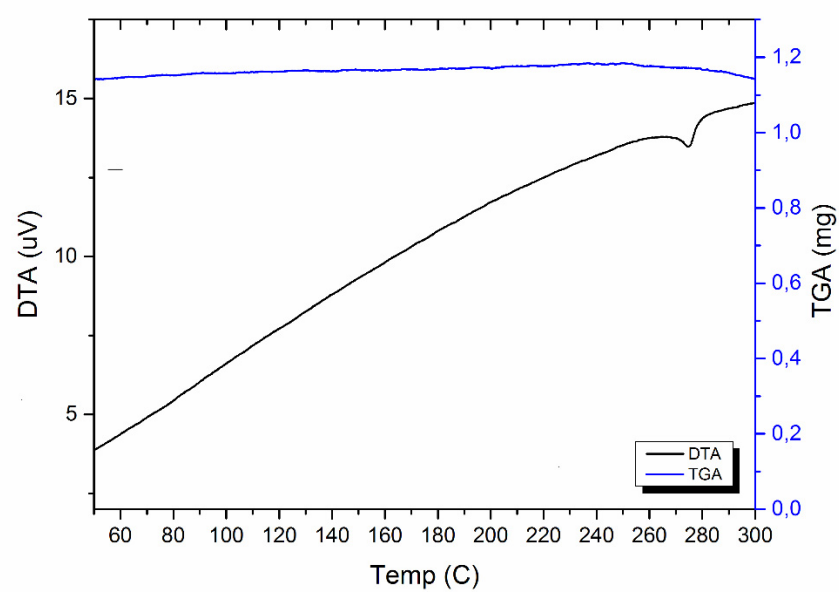

**Figure S5.** Thermogravimetric and differential thermal analysis curves of **PerTCNE**.

**Table S3.** Molar extinction coefficients for AntTCNE, PyrTCNE and PerTCNE in CH<sub>3</sub>CN

| Compound | Wavelength | lg ε |
|----------|------------|------|
| AntTCNE  | 369        | 3,75 |
|          | 523        | 3,28 |
| PyrTCNE  | 326        | 4,07 |
|          | 500        | 3,77 |
| PerTCNE  | 416        | 3,84 |
|          | 570        | 3,79 |

### The calculation of optical density

Optical density D was calculated using decimal logarithm of cuvette transmittance T.  $D=2-\log(T, \%)$ . D additional corresponds to difference between D and final experimental D at the largest time at the last point (approx. 215 hours). D is proportional to concentration of the molecules so time dependence demonstrates concentration decay as well.

**Table S4.** Decay time τ:

| Irradiation fluence, J/cm <sup>2</sup> | Decay time, h |
|----------------------------------------|---------------|
| 30                                     | 102           |
| 120                                    | 75            |

Decay time τ was calculated assuming  $D=D_0 \cdot \exp(-t/\tau)$  dependence as the best suitable. For all graphs the correlation coefficient is not lower than 0.96.

### Fluorescence quantum yield measurements [1]

Fluorescence quantum yields ( $\Phi_s$ ) are reported relative to cresyl violet perchlorate in MeOH ( $\Phi_r = 0.54$ )<sup>1</sup>. The experiments were performed using optically matched solutions and the quantum yields were calculated using Equation S1,

$$\Phi_s = \Phi_r \cdot \frac{A_r F_s}{A_s F_r} \cdot \frac{n_s^2}{n_r^2} \text{ (Equation S1)}$$

where,  $A_s$  and  $A_r$  are the absorbance of the sample and reference solutions, respectively, at the same excitation wavelength;  $F_s$  and  $F_r$  are the corresponding relative integrated fluorescence intensities of the sample and the reference; and  $n_s$  and  $n_r$  is the refractive index of the solvent used to measure the sample and the reference.

[1] J.R. Lakowicz, Principles of Fluorescence Spectroscopy, 1999.

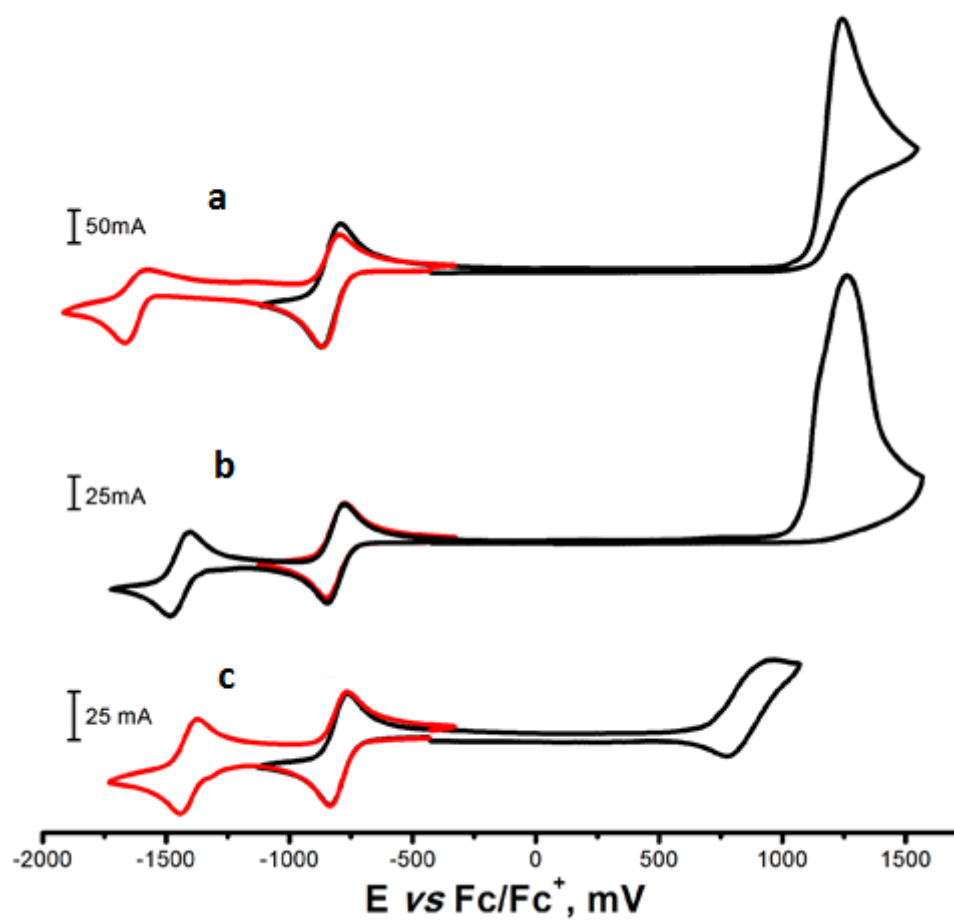

**Figure S6.** Cyclic voltammograms of **AntTCNE** (a), **PyrTCNE** (b) and **PerTCNE** (c)

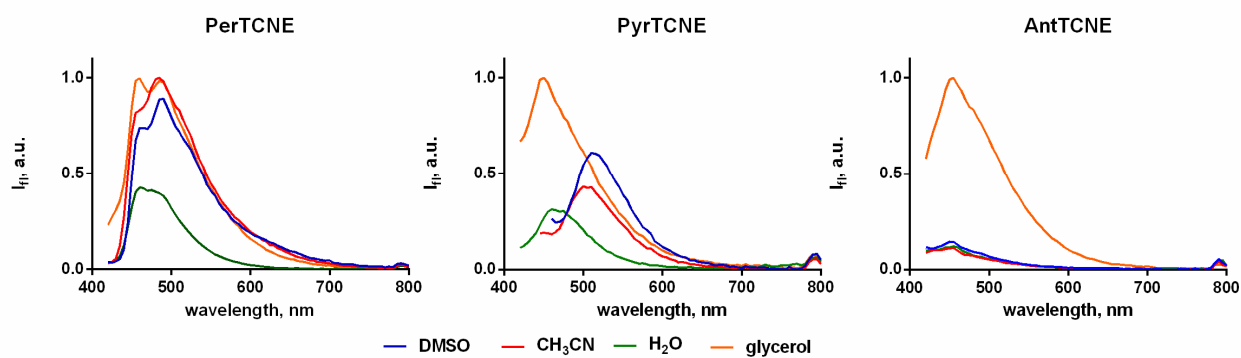

**Figure S7.** Emission spectra of **AntTCNE** (a), **PyrTCNE** (b) and **PerTCNE** (c) in the different solvent ( $10^{-6}$  mol/L,  $\lambda_{ex} = 400$  nm).



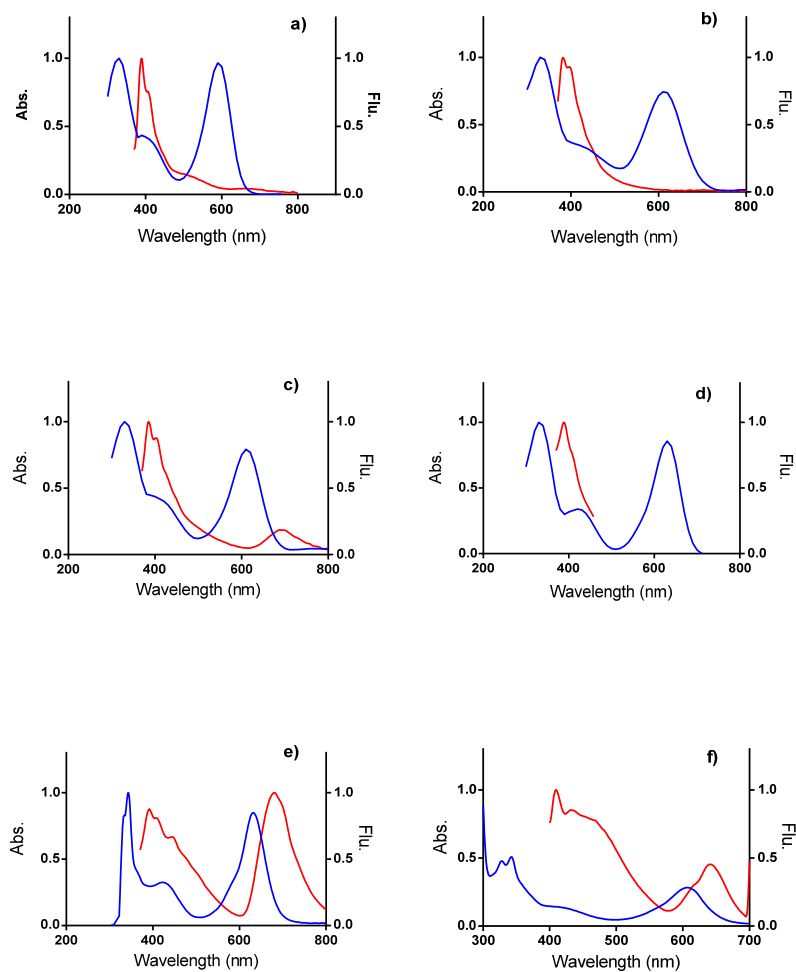

**Figure S8** Normalized spectra of absorption and fluorescence of of **Pyr<sub>4</sub>CN<sub>4</sub>Pz** ( $\lambda_{\text{exit}} = 350 \text{ nm}$ ,  $10^{-6} \text{ mol/L}$ ); according to Levshin's law [2:]; **(a)** – CH<sub>3</sub>CN, **(b)** – H<sub>2</sub>O **(c)** – PhCH<sub>3</sub>, **(d)** – THF, **(e)** – castor oil, **(f)** – polymer film

[2] Andrii V. Kulinich, Alexander A. IshchenkoStanislav L. BondarevValery N. Knyukshto Effect of donor and acceptor end-groups on electronic structure and spectral-fluorescent properties of merocyanines in frozen ethanol. Journal of Photochemistry & Photobiology, A: Chemistry 405 (2021) 112932 <https://doi.org/10.1016/j.jphotochem.2020.112932>

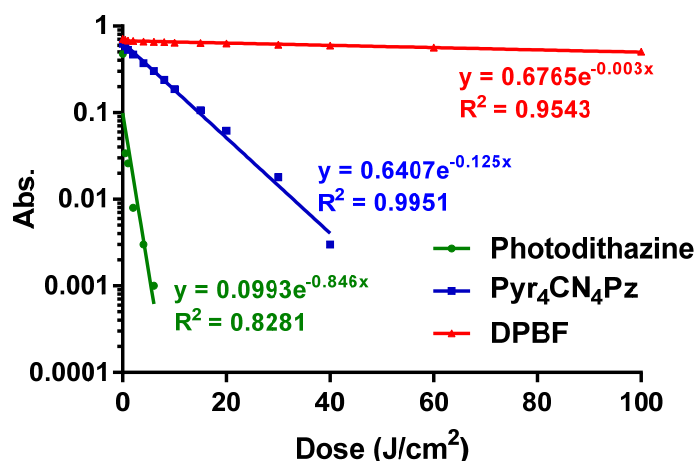

**Figure S9.** DPBF photobleaching sensitized by **Pyr<sub>4</sub>CN<sub>4</sub>Pz** and Photodithazine in DMSO under light irradiation (615–635 nm, 20 mW/cm<sup>2</sup>) and measured by absorption at 420 nm.

The quantum yield of singlet oxygen generation was calculated relative to the quantum yield of the Photodithazine (0.56 [1]) using the Equation:

$$\varphi_{\Delta 1} = \frac{\varphi_{\Delta 0} \times k_1 \times D_0}{k_0 \times D_1},$$

where  $\varphi_{\Delta 0}$  is the quantum yield of singlet oxygen generation of Photodithazine;  $\varphi_{\Delta 1}$  is the quantum yield of singlet oxygen generation of tested compound;  $k_1$  and  $k_0$  are rate constants of DPBF trap photobleaching sensitized by tested compound and Photodithazine, respectively;  $D_1$  and  $D_0$  are optical density of the compound and Photodithazine (without adding a trap DPBF).

1. Bagrov, I.V., Dadeko, A., Kiselev, V.M., Muravieva, T.D., Starodubtsev, A.M., 2019. Comparative studies of the photophysical properties of dimegin, photodithazine and radachlorin. *Journal of Technical Physics* 126, 162.

**Table S5.** Optical density values at 540 nm for DMSO and cells treated with Pyr<sub>4</sub>CN<sub>4</sub>Pz without the addition of MTT reagent

|                                                      | OD <sub>540</sub> * |
|------------------------------------------------------|---------------------|
| DMSO                                                 | 0.039 ± 0.003       |
| Cells with 5 uM Pyr <sub>4</sub> CN <sub>4</sub> Pz  | 0.041 ± 0.003       |
| Cells with 10 uM Pyr <sub>4</sub> CN <sub>4</sub> Pz | 0.042 ± 0.003       |
| * mean OD values and SD are indicated                |                     |

In order to evaluate the possible effect of Pyr<sub>4</sub>CN<sub>4</sub>Pz absorption at 540 nm on the results of the MTT assay, we checked the applicability of the protocol prior to the start of the experiment. To do this we performed the whole procedure on the cell culture with exception of the MTT reagent addition: incubation with the photosensitizer at the highest concentrations, changing the medium, light irradiation, incubation for a day, changing the medium again, incubation for four hours, discarding the medium, and dissolution in DMSO. As a result, the optical density in the plate wells did not differ from the blank (DMSO only). For comparison, when conducting the MTT assay, the optical density values reached about 0.5 in wells with control cells.
